# Supplementary material
Source: MDPI journal article supplement (https://www.mdpi.com/2073-4395/13/5/1311)
Supplement: s1 [file s1]

**Table S1** Primer sequences for amplifying three NAC genes

| Gene         |                | Sequence                 |
|--------------|----------------|--------------------------|
| Bnt01G000429 | Forward primer | CTCTCTCACGACCTATTGTAT    |
|              | Reverse primer | ATCTCATCACTGCCTCTGTT     |
| Bnt03G004081 | Forward primer | ATGAATGCTTTTGCACATGTACC  |
|              | Reverse primer | TCACTTCCACAATTCAATCTGAC  |
| Bnt14G020028 | Forward primer | ATGATGGATTCTATGGAGTCGAG  |
|              | Reverse primer | TCACTTCTCAAATATGCATATCCC |

**Table S2** Basic information for 60 ramie NAC genes

| Gene ID      | Group | Previous gene name | Arabidopsis ortholog |
|--------------|-------|--------------------|----------------------|
| Bnt01G000359 | VII   |                    |                      |
| Bnt01G000429 | IX    |                    | VND7                 |
| Bnt01G000636 | X     |                    | AT2G24430            |
| Bnt01G001234 | VIII  | BnNAC03            | ATAF1                |
| Bnt01G001968 | X     |                    | CUC3                 |
| Bnt02G002406 | VIII  |                    |                      |
| Bnt02G002422 | VI    | BnNAC16            |                      |
| Bnt02G003327 | VIII  | BnNAC05            |                      |
| Bnt03G004081 | IX    |                    |                      |
| Bnt03G004378 | VII   | BnNAC12, BnNAC23   | ANAC050, ANAC052     |
| Bnt03G004611 | IX    |                    | SMB                  |
| Bnt03G004638 | XI    |                    | ANAC020              |
| Bnt03G004997 | IX    |                    | VND4, VND5           |
| Bnt03G005388 | VI    | BnNAC06            | NTL6, TIP            |
| Bnt04G005489 | III   | BnNAC14            | SND2                 |
| Bnt04G006257 | VIII  |                    | JUB1                 |
| Bnt04G006656 | II    |                    |                      |
| Bnt04G006659 | X     | BnNAC21            |                      |
| Bnt04G006704 | VIII  |                    | AT5G39820            |
| Bnt04G006909 | III   | BnNAC01            | ANAC044, ANAC085     |
| Bnt04G007078 | VII   | BnNAC22            | ANAC084              |
| Bnt05G007257 | III   | BnNAC15            | SND2                 |
| Bnt05G007366 | VIII  |                    | TAPNAC               |
| Bnt05G007967 | VIII  | BnNAC08            | LOV1                 |
| Bnt05G008828 | II    |                    |                      |
| Bnt06G009357 | VIII  | BnNAC28            | ANAC036              |
| Bnt06G009714 | XI    | BnNAC17            | KIRA1                |
| Bnt06G010588 | VII   | BnNAC25            | XND1                 |

|              |      |         |                         |
|--------------|------|---------|-------------------------|
| Bnt07G011272 | IX   | BnNAC24 | SND1                    |
| Bnt07G011300 | I    | BnNAC11 |                         |
| Bnt07G011376 | V    |         |                         |
| Bnt07G011466 | XI   | BnNAC13 | ANAC071, ANAC096        |
| Bnt08G012167 | IX   |         | BRN1, BRN2              |
| Bnt08G012485 | I    |         | AT1G64100               |
| Bnt08G012573 | IX   | BnNAC19 | NST1, NST2              |
| Bnt08G012595 | IV   | BnNAC29 |                         |
| Bnt08G012848 | III  | BnNAC10 | ANAC075                 |
| Bnt08G013056 | VIII |         | ANAC072                 |
| Bnt08G013057 | VIII |         | NAM, AT3G15510          |
| Bnt08G013397 | X    |         | ANAC046, ANAC087        |
| Bnt08G013455 | XI   | BnNAC04 | AT3G12977, NAC1/ANAC021 |
| Bnt09G013921 | II   |         |                         |
| Bnt09G014067 | III  | BnNAC31 | SOG1                    |
| Bnt09G014278 | VIII | BnNAC07 | ATNAP                   |
| Bnt09G014314 | VIII |         |                         |
| Bnt09G014722 | VIII | BnNAC20 | VNI2, ANAC041           |
| Bnt10G015030 | X    | BnNAC32 | ANAC079/080, AT5G61430  |
| Bnt10G015117 | X    |         | ANAC058                 |
| Bnt10G015524 | V    |         |                         |
| Bnt10G015609 | VII  | BnNAC30 | XND1                    |
| Bnt10G015773 | VIII | BnNAC26 |                         |
| Bnt10G015808 | VIII |         | AT3G12910               |
| Bnt12G017160 | X    |         | ANAC046, ANAC087        |
| Bnt12G018013 | VIII |         | ANAC061, ANAC090        |
| Bnt13G018465 | II   |         |                         |
| Bnt14G019448 | VII  | BnNAC02 | ANAC082, AT5G64060      |
| Bnt14G019559 | VIII | BnNAC18 |                         |
| Bnt14G020028 | IX   | BnNAC09 | VND1, VND2              |
| BntUnG020221 | II   |         |                         |
| BntUnG020283 | VIII | BnNAC27 |                         |

---

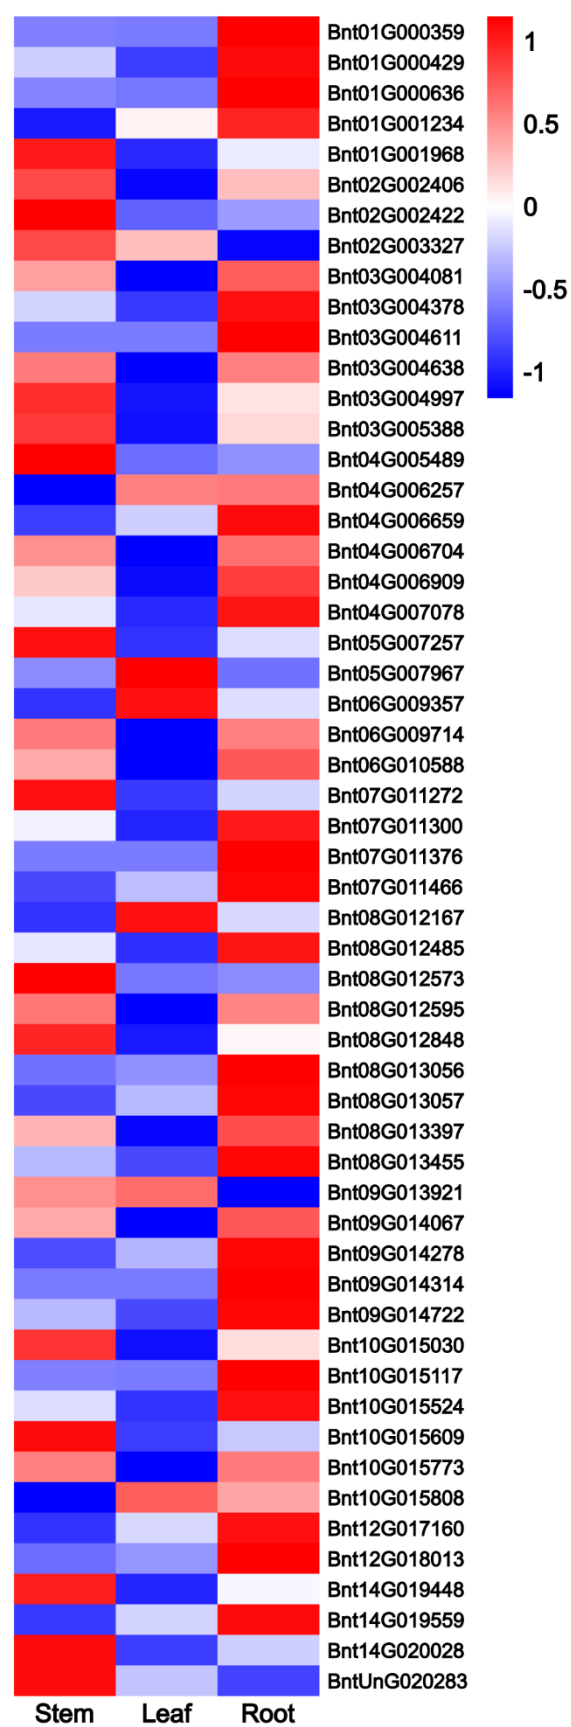

**Figure S1** Expression heatmap of ramie NAC genes in the stem, leaf, and root of Zhongsizhu 1

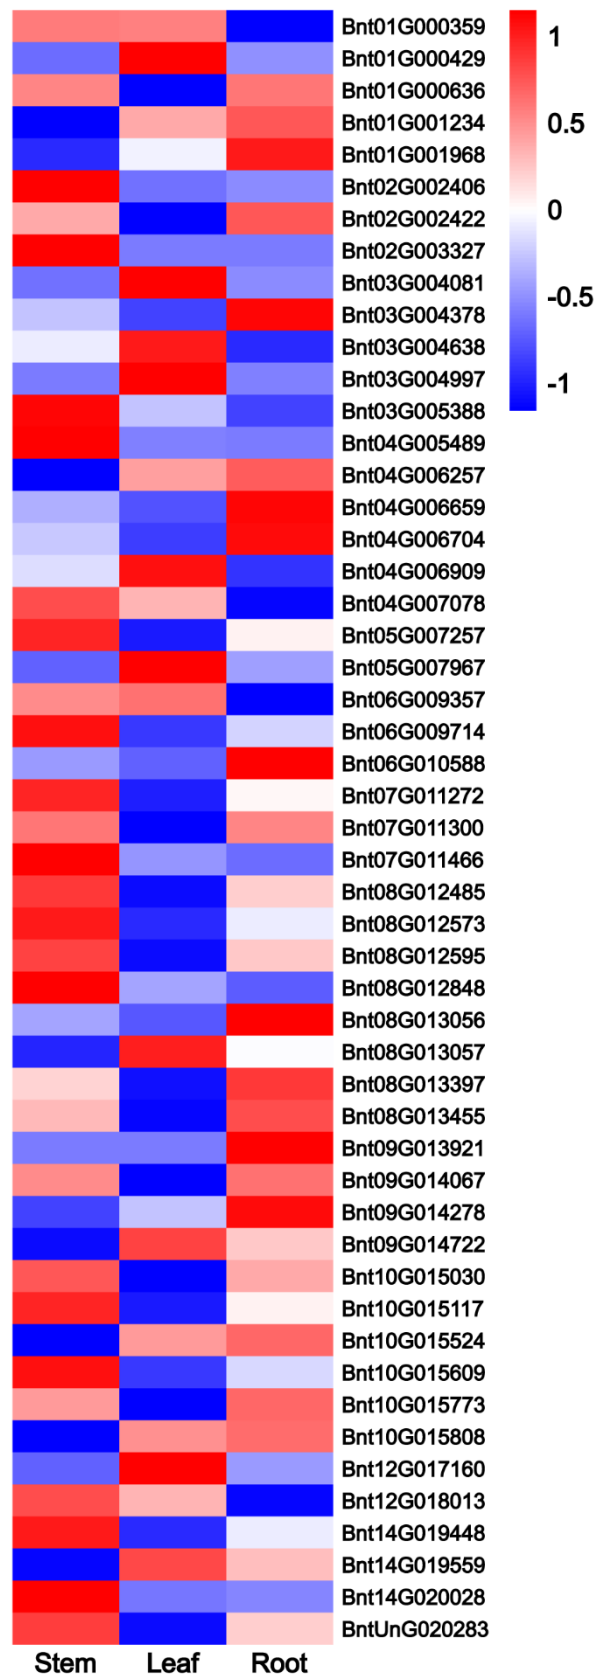

**Figure S2** Expression heatmap of ramie NAC genes in the stem, leaf, and root of *Boehmeria nivea* var. *tenacissima*
